# Supplementary material for: Preanalytical Biases in the Measurement of Human Blood Sphingolipids
Source: PubMed Central journal article supplement (PMC5983773; doi:10.3390/ijms19051390), 2018-05-07
Supplement: ijms-19-01390-s001.pdf [file ijms-19-01390-s001.pdf]

# Supplementary Materials: Preanalytical Biases in the Measurement of Human Blood Sphingolipids

Robert Brunkhorst, Waltraud Pfeilschifter, Sammy Patyna, Stefan Büttner, Timon Eckes, Sandra Trautmann, Dominique Thomas, Josef Pfeilschifter and Alexander Koch

## 1. Supplement

### 1.1. Material and Methods

#### 1.1.1. Measurement of Markers for Extracellular Hemolysis

Potassium, bilirubin, aspartate aminotransferase (AST), lactate dehydrogenase (LDH) levels in human serum samples were routinely measured at the central laboratory of the Goethe University Hospital Frankfurt. Hemoglobin levels in human plasma samples (EDTA) were colorimetric determined at 540 nm using Drabkin's reagent.

### 1.2. Tables

**Table S1.** Time- and temperature-dependent effect on relative levels of marker for extravascular hemolysis in human blood samples.

|                   | +22 °C     |             |               |                |                | +4 °C          |
|-------------------|------------|-------------|---------------|----------------|----------------|----------------|
|                   | 0 h        | 2 h         | 4 h           | 6 h            | 8 h            | 4 h            |
| Potassium         | 100 ± 5.12 | 98.3 ± 5.22 | 96.3 ± 5.02 * | 96.0 ± 6.00 ** | 95.3 ± 6.72 ** | 111 ± 4.98 *** |
| Bilirubin (total) | 100 ± 23.1 | 100 ± 36.5  | 105 ± 30.0    | 105 ± 30.0     | 95.0 ± 19.2    | 90.0 ± 25.8    |
| Bilirubin (ind.)  | 100 ± 22.2 | 111 ± 25.7  | 111 ± 25.7    | 111 ± 25.7     | 100 ± 22.2     | 100 ± 22.2     |
| AST               | 100 ± 34.9 | 97.2 ± 26.1 | 98.1 ± 31.6   | 106 ± 34.7     | 101 ± 33.0     | 99.1 ± 28.9    |
| LDH               | 100 ± 19.7 | 101 ± 16.9  | 104 ± 9.84    | 104 ± 15.8     | 96.9 ± 15.9    | 97.2 ± 14.6    |
| Hemoglobin        | 100 ± 16.3 | 96.2 ± 18.0 | 110 ± 24.4    | 92.3 ± 11.3    | 108 ± 25.3     | 148 ± 39.4 **  |

Mean (in %) ± SD;  $n = 4$ ; Repeated ANOVA (Bonferroni post test); \*  $p < 0.05$ , \*\*  $p < 0.01$ , \*\*\*  $p < 0.001$  compared to 0 h (+22 °C). Abbreviations: AST, aspartate aminotransferase; LDH, lactate dehydrogenase.

**Table S2.** Baseline sphingolipid concentrations.

|            | Plasma (ETDA) | Serum       |
|------------|---------------|-------------|
| C16Cer     | 120 ± 79.5    | 99.6 ± 82.8 |
| C18Cer     | 40.2 ± 17.1   | 35.0 ± 10.2 |
| C20Cer     | 68.3 ± 20.2   | 73.6 ± 36.2 |
| C24Cer     | 1512 ± 327    | 1476 ± 420  |
| C24:1Cer   | 424 ± 57.0    | 411 ± 113   |
| C24dhCer   | 90.3 ± 24.6   | 81.6 ± 20.3 |
| C24:1dhCer | 58.3 ± 15.6   | 56.8 ± 17.1 |
| S1P        | 240 ± 29.0    | 301 ± 76.1  |
| SA1P       | 47.0 ± 11.5   | 52.0 ± 16.1 |

Mean ± SD (ng/mL);  $n = 4$ .
